# Supplementary figures and images for: Global m6A methylation and gene expression patterns in human microglial HMC3 cells infected with HIV-1
Source: PubMed Central journal article supplement — Heliyon. 2023 Oct 26;9(11):e21307. doi: 10.1016/j.heliyon.2023.e21307 (PMC10643106; doi:10.1016/j.heliyon.2023.e21307), 2023-10-26

Figure 1

A Thp1/PMA

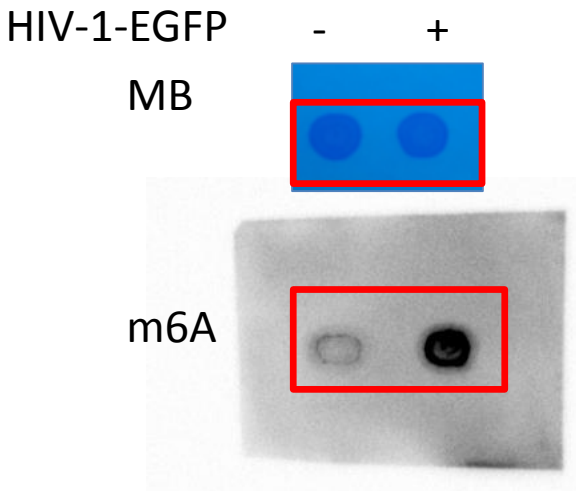

B HMC3

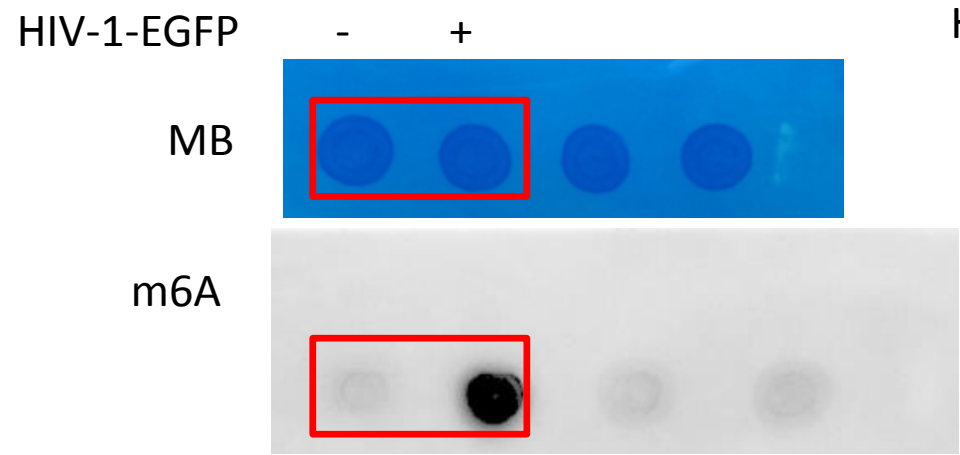

C MT4

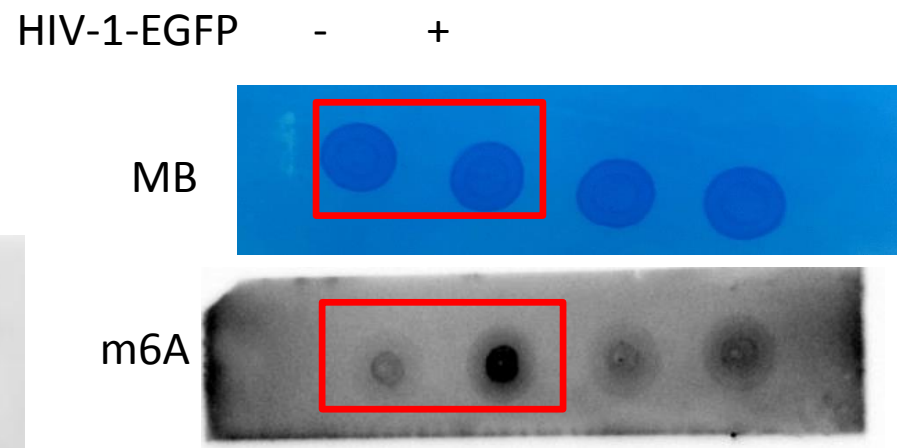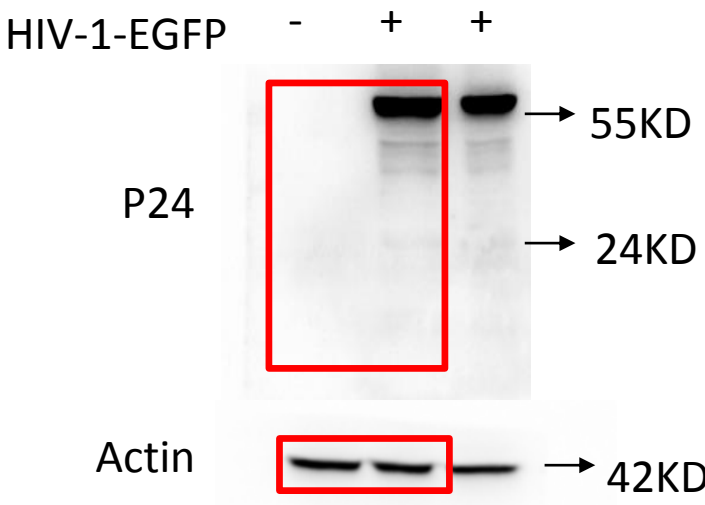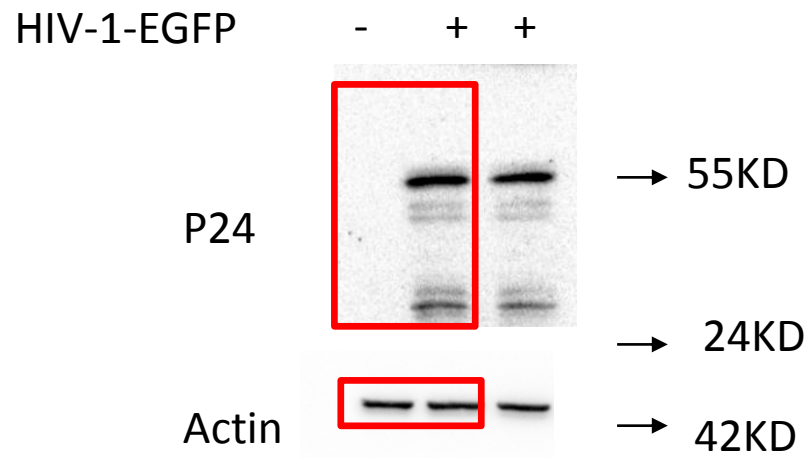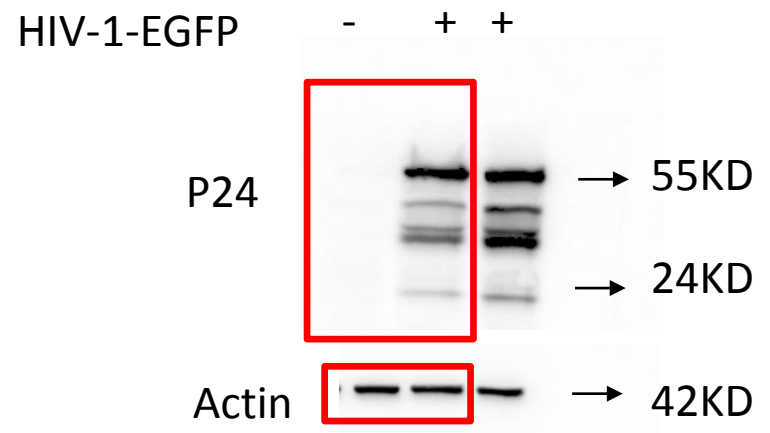

### D HMC3

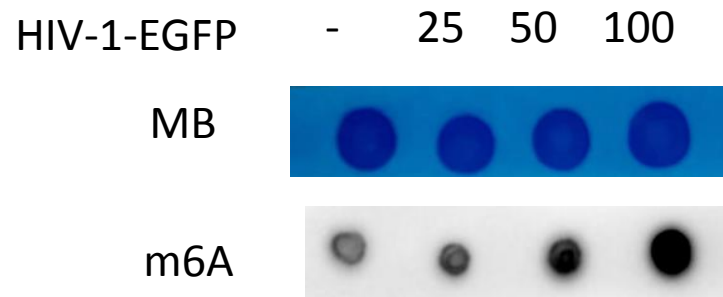

### E MT4

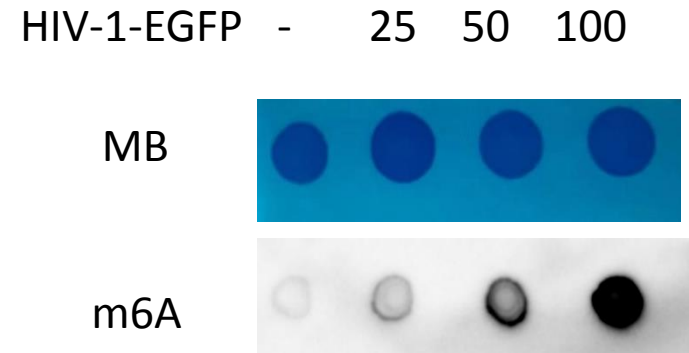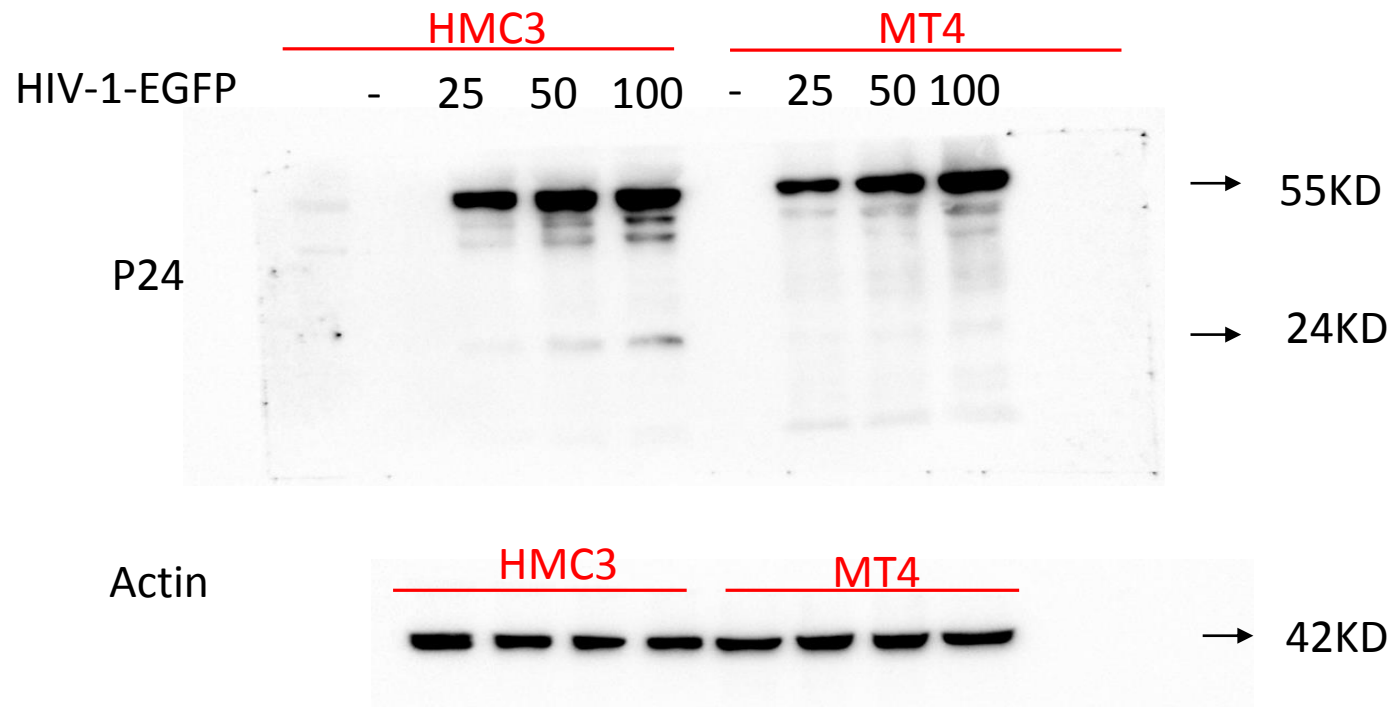

Supplement: mmc2.pdf [file mmc2.pdf]
